# Supplementary material
Source: PubMed Central journal article supplement (PMC419634)
Supplement: pnas_101_20_7499__1.pdf [file pnas_101_20_7499__1.pdf]

## Algorithm for cartogram displacement field construction

### Constants and variables

▷ Length of map in  $x$  and  $y$  directions

integer  $LX, LY$

▷ Array for densities

float  $\text{rho}_0[LX + 1][LY + 1]$ ,  $\text{rho}[LX + 1][LY + 1]$

▷  $\text{rho}_0[j][k]$  is the density at  $t = 0$ ,  $\text{rho}[j][k]$  that at  $t > 0$ .

▷ Arrays for the velocity field at integer-valued positions

float  $\text{gridvx}[LX + 1][LY + 1]$ ,  $\text{gridvy}[LX + 1][LY + 1]$

▷  $\text{gridvx}[j][k]$  is the velocity component in  $x$  direction at position  $(j, k)$ . Similarly for  $y$ .

▷ Arrays for the position at  $t > 0$

float  $x[LX + 1][LY + 1]$ ,  $y[LX + 1][LY + 1]$

▷  $x[j][k]$  is the  $x$ -coordinate for the element that was at position  $(j, k)$  at time  $t = 0$ .

▷ Arrays for the velocity field at position  $(x[j][k], y[j][k])$

float  $\text{vx}[LX + 1][LY + 1]$ ,  $\text{vy}[LX + 1][LY + 1]$

▷  $\text{vx}[j][k]$  is the velocity component in  $x$  direction at the position  $(x[j][k], y[j][k])$ .

### Program CARTOGRAM

Initialize  $\text{rho}_0$ .

If wanted, perform Gaussian blur by Fast Fourier Transform.

Replace  $\text{rho}_0$  by cosine Fourier transform in both variables.

$t \leftarrow 0$     ▷ Initialize time.

$h \leftarrow HINITIAL$     ▷ Initialize time step size.

▷ Initialize  $x$ ,  $y$ ,  $\text{vx}$  and  $\text{vy}$ .

**for**  $j \leftarrow 0$  **to**  $LX$

**do for**  $k \leftarrow 0$  **to**  $LY$

**do**  $x[j][k] \leftarrow j$

$y[j][k] \leftarrow k$

Call subroutine  $\text{CALCV}(\text{time} = 0.0)$ .

**for**  $j \leftarrow 0$  **to**  $LX$

**do for**  $k \leftarrow 0$  **to**  $LY$

**do**  $\text{vx}[j][k] \leftarrow \text{gridvx}[j][k]$

$\text{vy}[j][k] \leftarrow \text{gridvy}[j][k]$

**while** the position arrays  $x$  and  $y$  have not sufficiently converged

**do** Call subroutine CALCV(time =  $t + h$ ).

**for**  $j \leftarrow 0$  **to**  $LX$

**do for**  $k \leftarrow 0$  **to**  $LY$

**do**  $\triangleright$  Find the new positions in the following manner. First we take a naive integration step:

$$vxminus \leftarrow vx[j][k]$$

$$vyminus \leftarrow vy[j][k]$$

$$vxplus \leftarrow \vec{v}_x(t + h, x[j][k] + h * vx[j][k], \\ y[j][k] + h * vy[j][k]),$$

$$vyplus \leftarrow \vec{v}_y(t + h, x[j][k] + h * vx[j][k], \\ y[j][k] + h * vy[j][k]),$$

$\triangleright$  where the velocity  $\vec{v}$  at time  $t + h$  and position  $(x[j][k] + h * vx[j][k], y[j][k] + h * vy[j][k])$  can be interpolated from the arrays gridvx and gridvy. Then we expect the new position at time  $t + h$  to be:

$$xguess \leftarrow x[j][k] + 0.5 * h * (vxminus + vxplus)$$

$$yguess \leftarrow y[j][k] + 0.5 * h * (vyminus + vyplus)$$

$\triangleright$  Then we make a better approximation by solving the two nonlinear equations:

$$xappr[j][k] - 0.5 * h * \vec{v}_x(t + h, xappr[j][k], yappr[j][k]) - x[j][k] \\ - 0.5 * h * vx[j][k] = 0,$$

$$yappr[j][k] - 0.5 * h * \vec{v}_y(t + h, xappr[j][k], yappr[j][k]) - y[j][k] \\ - 0.5 * h * vy[j][k] = 0$$

$\triangleright$  simultaneously for  $xappr[j][k]$ ,  $yappr[j][k]$ , e.g., using the Newton-Raphson method with  $(xguess, yguess)$  as initial guess. The velocity  $\vec{v}$  at time  $t + h$  and position  $(xappr[j][k], yappr[j][k])$  can again be interpolated from the arrays gridvx and gridvy. If  $(xguess, yguess)$  and  $(xappr[j][k], yappr[j][k])$  differ by more than some predefined tolerance, reduce step size  $h$ , break, and try again.

$t \leftarrow t + h$

**for**  $j \leftarrow 0$  **to**  $LX$

**do for**  $k \leftarrow 0$  **to**  $LY$

**do**  $x[j][k] \leftarrow xappr[j][k]$

$y[j][k] \leftarrow yappr[j][k]$

$vx[j][k] \leftarrow \vec{v}_x(t + h, xappr[j][k], yappr[j][k])$

$vy[j][k] \leftarrow \vec{v}_y(t + h, xappr[j][k], yappr[j][k])$

Increase step size  $h$ .

**Subroutine CALCV(time t)**

▷ First calculate the density rho by filling the array with the Fourier coefficients.

**for**  $j \leftarrow 0$  **to**  $LX$

**do for**  $k \leftarrow 0$  **to**  $LY$

**do**  $\text{rho}[j][k] \leftarrow$

$\exp(-((\pi * j/LX)*(\pi * j/LX)+(\pi * k/LY)*(\pi * k/LY))*t)*\text{rho}_0[j][k]$

▷ Calculate the Fourier coefficients for the partial derivative of rho. Store temporary result in arrays gridvx, gridvy.

**for**  $j \leftarrow 0$  **to**  $LX$

**do for**  $k \leftarrow 0$  **to**  $LY$

**do**  $\text{gridvx}[j][k] \leftarrow -(\pi * j/LX)*\text{rho}[j][k]$

$\text{gridvy}[j][k] \leftarrow -(\pi * k/LY)*\text{rho}[j][k]$

Replace rho by cosine Fourier backtransform in both variables.

Replace vx by sine Fourier backtransform in the first and cosine Fourier backtransform in the second variable.

Replace vy by cosine Fourier backtransform in the first and sine Fourier backtransform in the second variable.

▷ Calculate the velocity field.

**for**  $j \leftarrow 0$  **to**  $LX$

**do for**  $k \leftarrow 0$  **to**  $LY$

**do**  $\text{gridvx}[j][k] \leftarrow -\text{gridvx}[j][k]/\text{rho}[j][k]$

$\text{gridvy}[j][k] \leftarrow -\text{gridvy}[j][k]/\text{rho}[j][k]$
